# Supplementary material
Source: Royal Society of Chemistry journal article supplement (doi:10.1039/d6tc00134c)
Supplement: d6tc00134c1.pdf [file d6tc00134c1.pdf]

## Supporting Information

### TiO<sub>2</sub>-Driven Enhancement of Electrochromic Performance of Polymer Electrolytes: Insights and Mechanisms

Wei Wang<sup>a</sup>, Siqi Wang<sup>a</sup>, Yan Wang<sup>a</sup>, Di Rong<sup>a</sup>, Ruize Yuan<sup>a</sup>, Zaiqian Yu<sup>a,b\*</sup>, Shiwei Wang<sup>a\*</sup>

<sup>a</sup>School of Chemical Engineering, Changchun University of Technology, Changchun, People's Republic of China, 130001

<sup>b</sup>School of Materials Science and Engineering, Nanyang Technological University, Republic of Singapore, 639798

\*Correspondence should be addressed to: [wswjldx2004@163.com](mailto:wswjldx2004@163.com).

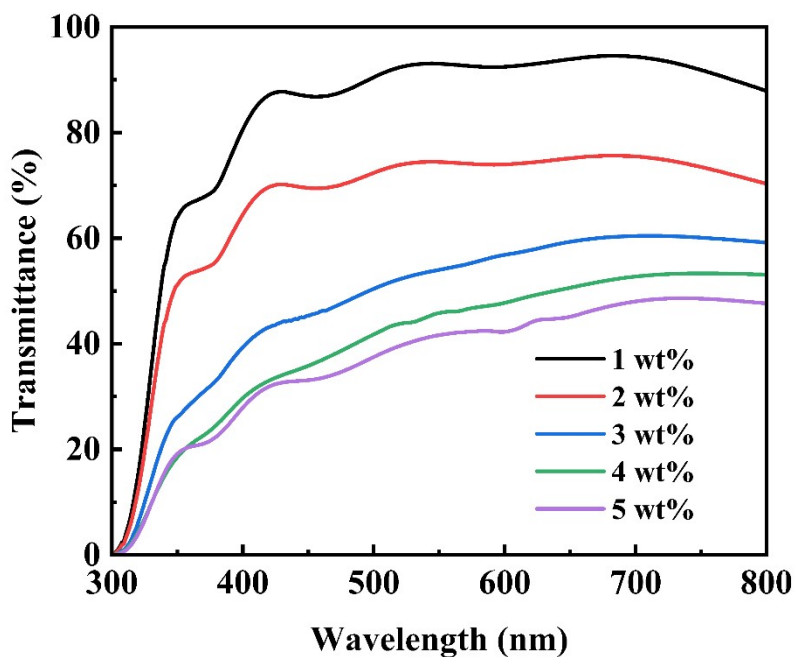

Fig. S1 Transmittance of ECDs composed of CPE films with different TiO<sub>2</sub> concentrations

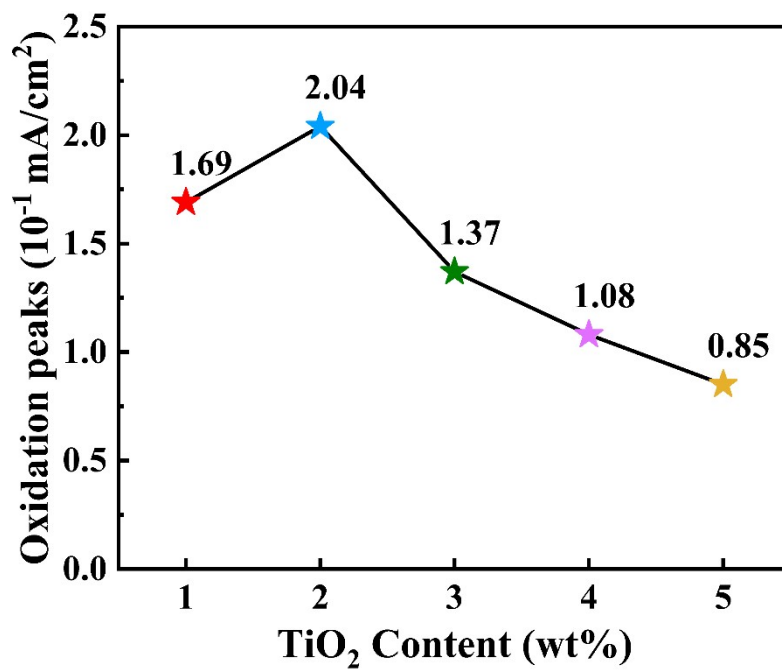

Fig. S2 Cyclic voltammetry curves for different TiO<sub>2</sub> contents of CPE films: Oxidation peak

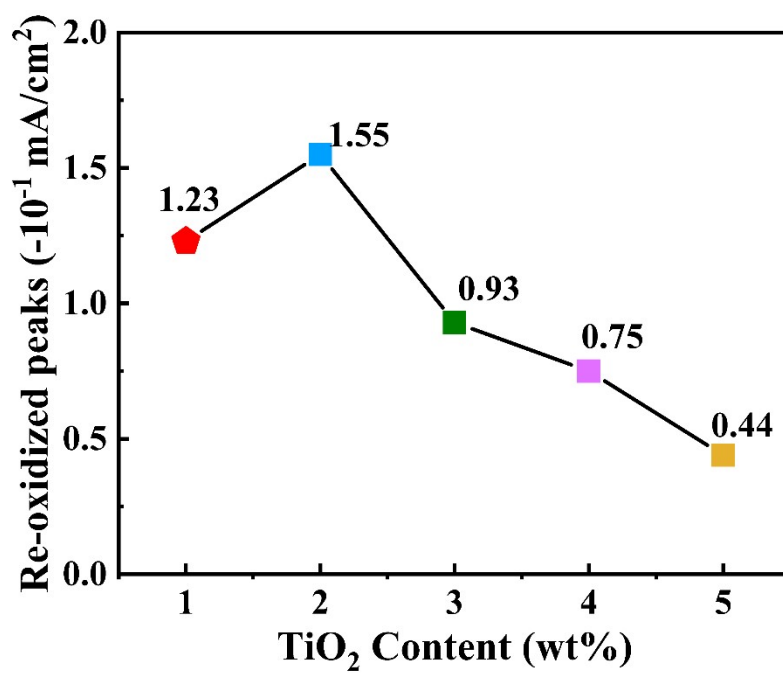

**Fig. S3** Cyclic voltammetry curves for different TiO<sub>2</sub> contents of CPE films: (i) Reduction peak
